# Supplementary material for: Fenofibrate Nano-Eyedrops Ameliorate Retinal Blood Flow Dysregulation and Neurovascular Coupling in Type 2 Diabetic Mice
Source: Pharmaceutics. 2022 Feb 9;14(2):384. doi: 10.3390/pharmaceutics14020384 (PMC8876509; doi:10.3390/pharmaceutics14020384)
Supplement: Supplementary file 1 [file pharmaceutics-14-00384-s001.zip › pharmaceutics-1532497-supplementary.pdf]

# Supplementary Materials: Fenofibrate Nano-eyedrops Ameliorate Retinal Blood Flow Dysregulation and Neurovascular Coupling in Type 2 Diabetic Mice

Junya Hanaguri, Noriaki Nagai, Harumasa Yokota, Akifumi Kushiya, Masahisa Watanabe, Satoru Yamagami and Taiji Nagaoka

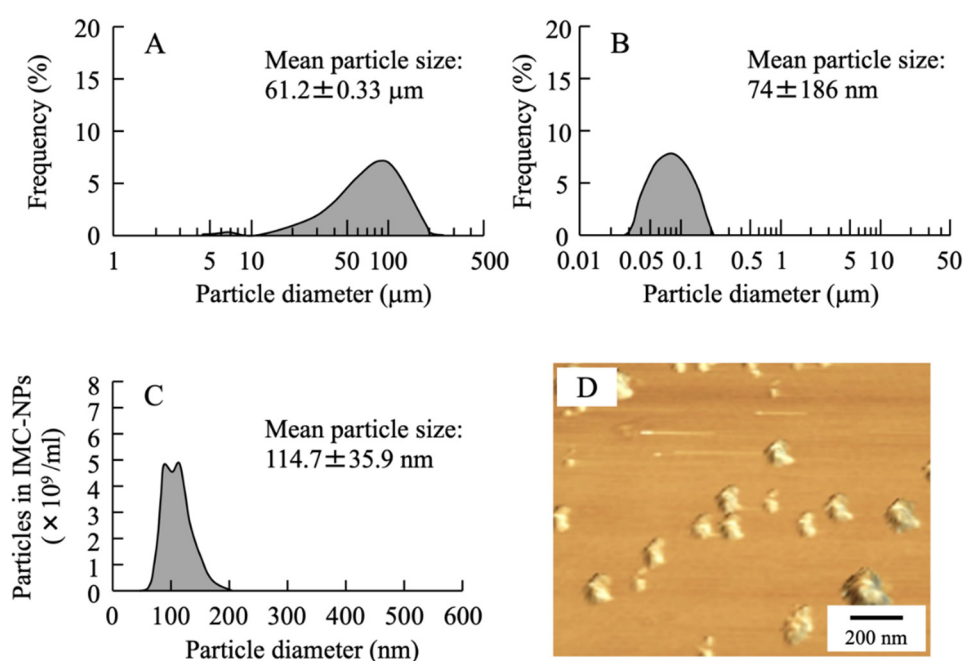

**Figure S1.** Size frequency distribution and images of fenofibrate ophthalmic formulations. A and B: cumulative size distribution of Feno-Micro (A) and FenoNano (B) in the SALD-7100. (C) cumulative size distribution of FenoNano in the NANOSIGHT LM10. (D) AFM image of FenoNano in the SPM-9700.

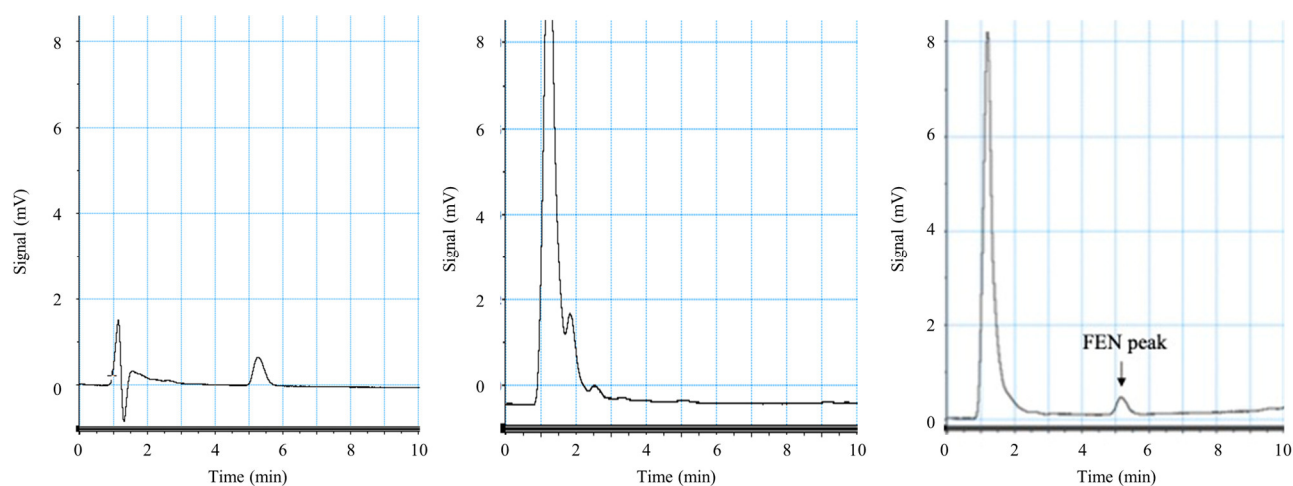

**Figure S2.** The representative HPLC chromatograms to determine the rat retinal concentration of fenofibrate (FEN). (A) HPLC chromatogram of FEN reagent. (B) HPLC chromatogram in supernatants of retina (negative control). (C) HPLC chromatogram in supernatants of retina instilled with FEN.

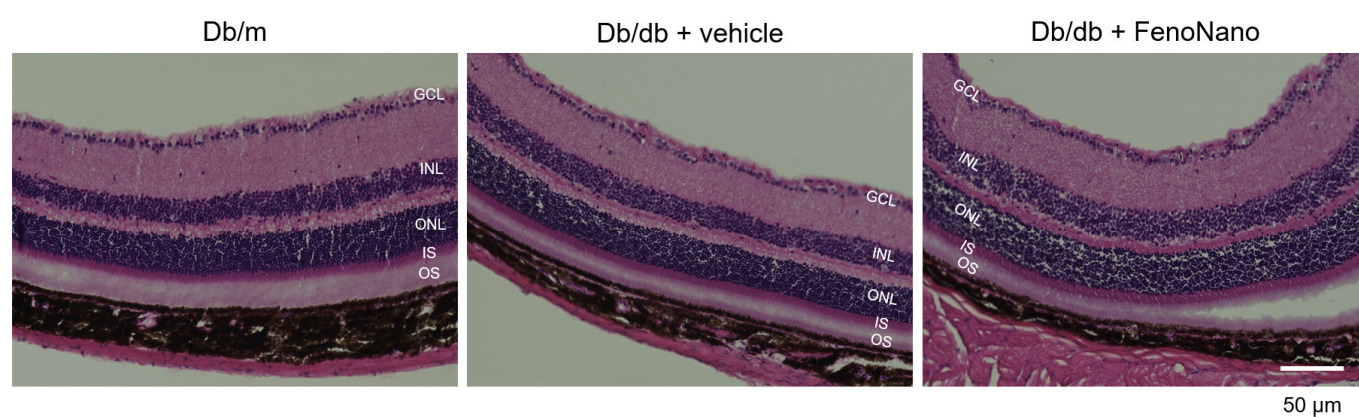

**Figure S3.** The HE stainings of the whole retina in non-diabetic control db/m, db/db with vehicle, and db/db with FenoNano eyedrop at 14 weeks of age.
